# Supplementary material for: 18FDG PET Assessment of Therapeutic Response in Patients with Advanced or Metastatic Melanoma Treated with First-Line Immune Checkpoint Inhibitors
Source: Cancers (Basel). 2022 Jun 29;14(13):3190. doi: 10.3390/cancers14133190 (PMC9264956; doi:10.3390/cancers14133190)
Supplement: Supplementary file 1 [file cancers-14-03190-s001.zip › Table S1.xlsx]

## Sheet: Feuil1
Table S1. Follow-up of responder patients PR for partial response, CR for complete response, BOR for the best response obtained on successive PET/CT on the same treatment, P for Pembrolizumab, N for Nivolumab, I+N for the combination of Ipilimumab and Nivolumab, LDH level if recurrence ( 0: normal level, 1: high level)
Patient	PERCIST5/	BOR	Type of	Nb of cycles	Discontinuing	Causes of	Disease	LDH level if	Progression-	Death	Overall
nb	imPERCIST5		immunotherapy		treatment	treatment	progression	recurrence	free survival	(yes, no)	survival
	score		used			discontinuation	(yes/no)	(0;1)	(months)		(months)
3	CR	CR	P	11	yes	death	no		9	yes (stroke)	9
9	CR	CR	P	5	yes	geriatric disorders	no		>43	no	>43
11	PR	CR	I+N	4+48	yes	prolonged CR	yes	0	2.3	no	>50
13	PR	PR	P	1	yes	adverse events	no		31	yes	31
16	PR	PR	I+N	1	yes	adverse events	yes	0	5.8	no	>47
22	PR	CR	N	18	yes	adverse events	yes	0	21	no	>34
23	PR	PR	N	43	no		yes	0	15	no	>32
24	PR	CR	N	25	yes	prolonged CR	no		>33	no	>33
25	PR	CR	P	19	yes	adverse events	no		>59	no	>59
26	PR	PR	I+N	1	yes	adverse events	no		>58	no	>58
28	CR	CR	P	27	yes	prolonged CR	no		>33	no	>33
