# Supplementary material for: 18FDG PET Assessment of Therapeutic Response in Patients with Advanced or Metastatic Melanoma Treated with First-Line Immune Checkpoint Inhibitors
Source: Cancers (Basel). 2022 Jun 29;14(13):3190. doi: 10.3390/cancers14133190 (PMC9264956; doi:10.3390/cancers14133190)
Supplement: Supplementary file 1 [file cancers-14-03190-s001.zip › Table S2.xlsx]

## Sheet: Feuil1
Table S2. Follow-up of non-responder patients according to PERCIST5 and imPERCIST5 criteria PD for progressive disease, SD for stable disease, CR for complete response, BOR for the best response obtained on sucessive PET/CT on the same treatment, P for Pembrolizumab, N for Nivolumab, I+N for Ipilimumab and Nivolumab combination, I for Ipilimumab, LDH level if recurrence (0: normal level, 1: high …
Patient Nb	Type of immunotherapy used	PERCIST5	imPERCIST5	BOR	ECOG performance status if recurrence	LDH level if recurrence	Type of subsequent treatment	Death (Yes/No)	Overall survival after discontinuing first line immunotherapy (months)
1	P	PD	PD	PD	0	1	Talimogene + I	Yes	8.7
2	P	PD	PD	PD	1	0	Temodal + RT	Yes	11
4	N	SD	SD	SD	0	NA	intra lesional I + Temodal	Yes	6.4
5	P	PD	PD	PD	1	0	N then Deticene	Yes	13.5
6	P	PD	SD	PD	2	0	Deticene + RT	Yes	8.5
7	P	PD	PD	PD	1	0	Deticene then I	No	>60.7
8	P	PD	SD	PD	0	0	Dabrafenib+Trametinib then N then RT	lost to follow up	>30.8
10	P	PD	PD	PD	1	1	Dabrafenib+Trametinib then Binimetinib+Encorafénib	Yes	12.5
12	I+N	PD	PD	PD	1	0	N then Deticene then P then Trametinib	Yes	22.1
14	I+N	PD	PD	PD	0	0	N then surgery then Trametinib then Cobimetinib + P	No	>38.2
15	P	PD	SD	PD	2	1	RT	Yes	3
17	N	PD	SD	CR	0	1	surgery then I+N	No	>24.8
18	N	PD	SD	PD	0	1	Protocole Debio then Imatinib+Glivec then Nilotinib	Yes	15.6
19	N	PD	SD	PD	NA	1	NC	Yes	1.1
20	N	SD	SD	SD	1	NA	RT	Yes	5
21	P	SD	SD	SD	0	0	I+N then RT then Lapatinib	Yes	7.4
27	N	SD	SD	SD	0	0	antiPD21 + inh CDK4/6 then TVEC +P	No	>20.3
29	P	PD	PD	PD	0	0	I then Dacarbazine then N then Trametinib	Yes	46.2
